# Supplementary material
Source: ML conference proceedings conference paper supplement (https://proceedings.neurips.cc/paper_files/paper/2021/hash/6591d327f6f731e589b0e869adadf940-Abstract.html)
Supplement: Supplementary file 1 [file 6591d327f6f731e589b0e869adadf940-Supplemental.zip]

Archive with 6 entries (4 files):
- Supplemental-Material-Complete/
- Supplemental-Material-Complete/supplement.pdf
- Supplemental-Material-Complete/code/
- Supplemental-Material-Complete/code/histools.py
- Supplemental-Material-Complete/code/readme.txt
- Supplemental-Material-Complete/code/exp.py
