# Supplementary material
Source: ML conference proceedings conference paper supplement (https://proceedings.neurips.cc/paper_files/paper/2021/hash/6591d327f6f731e589b0e869adadf940-Abstract.html)
Supplement: Supplementary file 1 [file 6591d327f6f731e589b0e869adadf940-Supplemental.zip › Supplemental-Material-Complete/code/readme.txt]

This readme is only relevant to the experimental code.

Files: histools.py exp.py

Instructions: Run exp.py in python3 and output will be printed.

Parameters: in the exp.py file the experimental parameters (dimension, dataset, max bins, max components) can be found my searching for the "NeurIPS" tag in the comments

Required libraries can be found in the histools.py and exp.py headers and include:

-Numpy
-Scipy
-Scikit-learn
-Tensorly
